# Supplementary material for: Drying kinetics of water droplets stabilized by surfactant molecules or solid particles in a thin non-volatile oil layer
Source: Royal Society of Chemistry journal article supplement (doi:10.1039/c7sm01989k), 2017-01-01
Supplement: c7sm01989k6.pdf [file c7sm01989k6.pdf]

**Drying kinetics of water droplets stabilized by surfactant molecules or solid particles in  
a thin non-volatile oil layer.**

Hayato Miyazaki <sup>a</sup> and Susumu Inasawa <sup>a,b\*</sup>

<sup>a</sup> Graduate School of Bio-Applications and Systems Engineering, Tokyo University of  
Agriculture and Technology, Koganei, Tokyo 184-8588, Japan

<sup>b</sup> Department of Chemical Engineering, Tokyo University of Agriculture and Technology,  
Koganei, Tokyo 184-8588, Japan

\* inasawa@cc.tuat.ac.jp

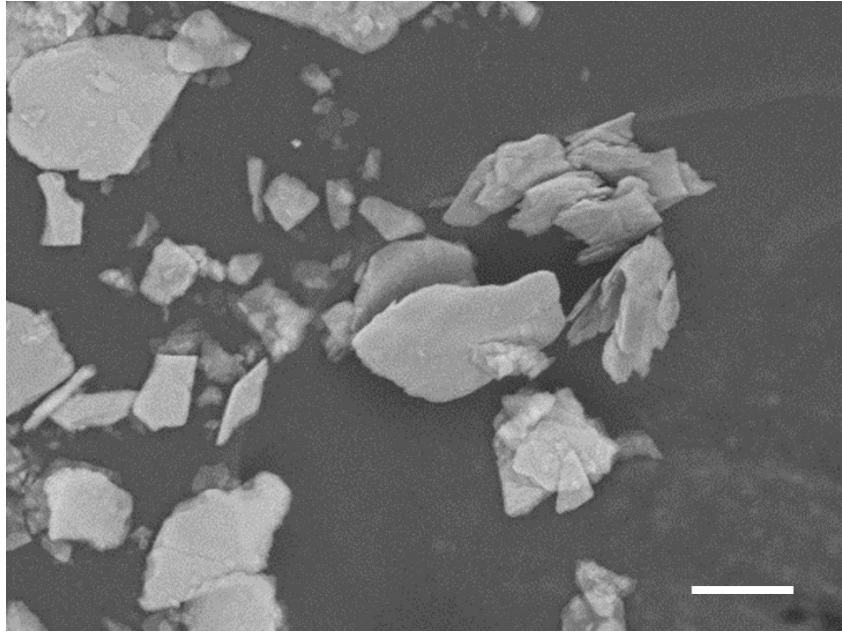

Fig. S1 Scanning electron microscope image of the mica particles. The scale bar is 20  $\mu\text{m}$ .

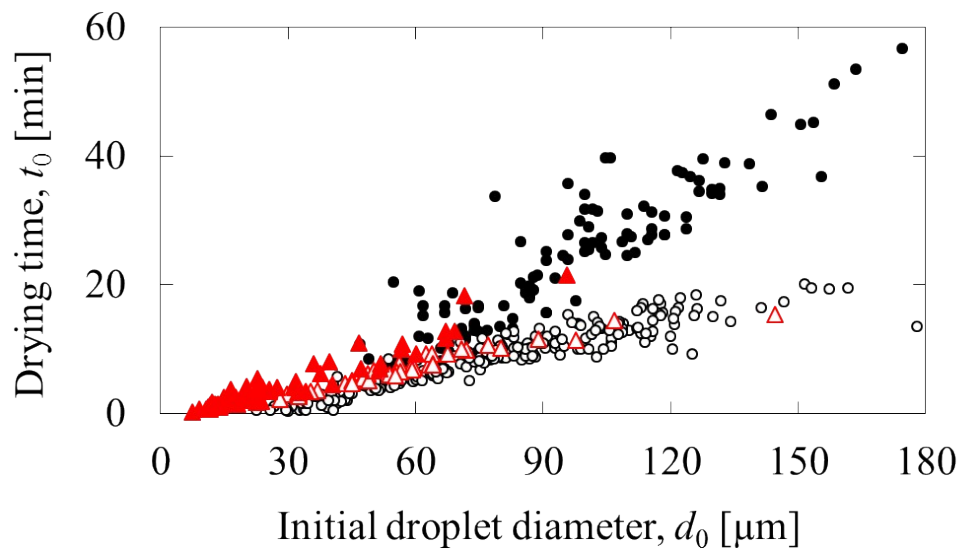

Fig. S2 Relationships between  $t_0$  and the initial diameter of the droplet in oil layers with  $L = 108 \mu\text{m}$  (open symbols) and  $458 \mu\text{m}$  (solid symbols). The droplets were stabilized by  $\text{SiO}_2$  nanoparticles (black circles) and the molecular surfactant (red triangles).
